# Supplementary material for: Polarised phosphorescent emission in an organoplatinum(ii)-based liquid-crystalline polymer
Source: Royal Society of Chemistry journal article supplement (doi:10.1039/c2cc35085h), 2012-01-01
Supplement: c2cc35085h.pdf [file c2cc35085h.pdf]

# **Polarised Phosphorescent Emission in an Organoplatinum(II)- based Liquid-crystalline Polymer**

**Álvaro Díez, Stephen J. Cowling and Duncan W. Bruce\***

**Supplementary Information**

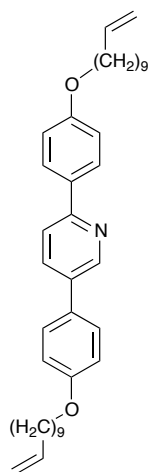

Figure S1 Analogue of **2** *without* the fused C<sub>5</sub> ring

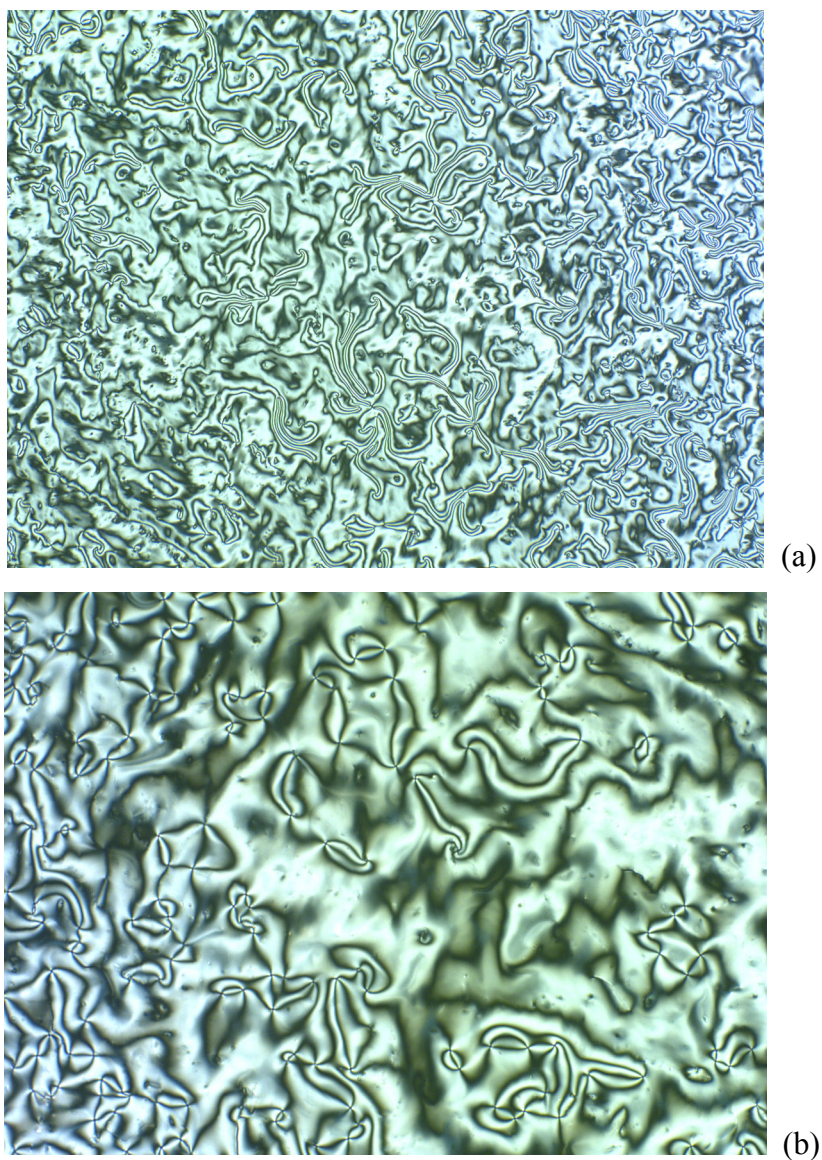

Figure S2 (a) SmC phase (204 °C on cooling) and (b) SmI phase (167 °C on cooling) of the compound in Fig. S1.

## Synthesis

2,5-Di{4-(undec-10-enyloxyphenyl)}cyclopentenopyridine (**1**).

2,5-Di(4-hydroxyphenyl)cyclopentenopyridine (0.400 g, 1.32 mmol) was added to a solution of 11-bromo-1-undecene (0.7 cm<sup>3</sup>, 3.18 mmol) and potassium carbonate (1.83 g, 13.2 mmol) in DMF (60 cm<sup>3</sup>). The dark solution was stirred and heated at 95 °C for 12 h. After cooling to room temperature, the mixture was dropped into H<sub>2</sub>O (50 cm<sup>3</sup>) and the resultant precipitate was filtered and washed with EtOH (2 × 5 cm<sup>3</sup>) and acetone (4 cm<sup>3</sup>). **1** was obtained as a brown solid (0.550 g, 68%).

<sup>1</sup>H NMR δ<sub>H</sub> (399.78 MHz, CDCl<sub>3</sub>): 8.49 (1H, s, H<sup>6</sup>), 7.73 (2H, d, *J*(H-H) = 8.8 Hz, AA'XX'), 7.40 (2H, d, *J*(H-H) = 8.7 Hz, AA'XX'), 6.98 (4H, dd, <sup>3</sup>*J*(H-H) = 8.8 Hz, <sup>4</sup>*J*(H-H) = 2.2 Hz, AA'XX'), 5.81 (2H, m, CH=CH<sub>2</sub>), 4.96 (4H, m, CH=CH<sub>2</sub>), 4.00 (4H, m, OCH<sub>2</sub>), 3.14 (2H, t, CH<sub>2</sub> cyclopent), 3.01 (2H, t, CH<sub>2</sub> cyclopent), 2.04 (6H, m, 2H cyclopent + 4H CH<sub>2</sub>), 1.80 (4H, m, CH<sub>2</sub>), 1.48 (4H, m, CH<sub>2</sub>), 1.30 (20H, br m, CH<sub>2</sub>). MS(ESI+) *m/z* (%): 608.4 (100) [M<sup>+</sup>]. Calcd. for C<sub>42</sub>H<sub>57</sub>NO<sub>2</sub> (607.44): C 82.97, H 9.46, N 2.30; found C 83.07, H 9.29, N 2.36.

## Complex 4.

Compound **2** (0.500 g, 0.822 mmol) was added over a yellow-pink suspension of [PtCl<sub>2</sub>(dms)<sub>2</sub>] (0.321 g, 0.822 mmol) in deoxygenated ethoxyethanol (70 cm<sup>3</sup>). The mixture was heated to reflux (125 °C) and stirred overnight. The solvent was then removed and the intermediate dms complex, [Pt(L)Cl(dms)] (**3**) was collected by addition of EtOH as a dark solid (0.560 g, 0.622 mmol, 76%). Without further purification, Na(acac) (0.087 g, 0.622 mmol) in a mixture of acetone/CH<sub>2</sub>Cl<sub>2</sub> (2:1, 45 cm<sup>3</sup>), was added to the dark solid obtained. The resultant suspension was stirred overnight at room temperature and then the solvent was removed, CH<sub>2</sub>Cl<sub>2</sub> was added and the suspension filtered through celite. Complex **4** was obtained as a yellow solid after evaporation of the solvent and purification by column chromatography on silica using CHCl<sub>3</sub> as eluent (0.213 g, 38%).

<sup>1</sup>H NMR δ<sub>H</sub> (399.78 MHz, CDCl<sub>3</sub>): 8.82 (1H, d, <sup>3</sup>*J*(Pt-H) = 36.0 Hz, H<sup>6</sup>), 7.51 (1H, d, <sup>3</sup>*J*(H-H) = 7.51 Hz, Ar), 7.37 (2H, d, *J* = 8.7 Hz, AA'XX'), 7.18 (1H, d, <sup>3</sup>*J*(H-H) = 2.6 Hz, H<sup>x</sup>),

6.99 (2H, d,  $J = 8.7$  Hz, AA'XX'), 6.66 (1H, dd,  $^3J(\text{H-H}) = 8.6$  Hz,  $^4J(\text{H-H}) = 2.6$  Hz, Ar), 5.81 (2H, m, CH=), 5.44 (1H, s, CH acac), 4.97 (4H, m, =CH<sub>2</sub>), 4.08 (2H, t,  $^3J(\text{H-H}) = 6.6$  Hz, OCH<sub>2</sub>), 4.01 (2H, t,  $^3J(\text{H-H}) = 6.5$  Hz, OCH<sub>2</sub>), 3.36 (2H, t,  $^3J(\text{H-H}) = 7.3$  Hz, CH<sub>2</sub> cyclopenten), 3.02 (2H, t,  $^3J(\text{H-H}) = 7.6$  Hz, CH<sub>2</sub> cyclopenten), 2.18 (2H, m, CH<sub>2</sub> cyclopenten), 2.04 (4H, m, CH<sub>2</sub>), 1.99 (3H, s, CH<sub>3</sub> acac), 1.94 (3H, s, CH<sub>3</sub> acac), 1.81 (4H, m, CH<sub>2</sub>), 1.48 (4H, m, CH<sub>2</sub>), 1.31 (20H, br m, CH<sub>2</sub>). MS(MALDI+)  $m/z$  (%): 801.4 (100) [(M – acac)<sup>+</sup>], 900.4 (18) [M<sup>+</sup>]. Calcd. for C<sub>47</sub>H<sub>63</sub>NO<sub>4</sub>Pt (900.44): C 62.64, H 7.05, N 1.56; found C 62.55, H 7.04, N 1.65.

### Polymer 5.

Over a pale yellow suspension of complex **4** (0.15 g, 0.166 mmol) in dry toluene (1.5 cm<sup>3</sup>), 1,1,3,3-tetramethyldisiloxane (42 μl, 0.166 mmol) and a solution of [PtCl<sub>2</sub>(COD)] in dichloromethane (1% w/w, 30 μl) were added. The temperature was increased to 50 °C and the resultant solution was stirred overnight. The polymer **4** was then isolated as a pale yellow solid by precipitation in methanol, before being purified by successive precipitations from methanol and air dried (0.169 g, 91%).

<sup>1</sup>H NMR δ<sub>H</sub> (399.78 MHz, CDCl<sub>3</sub>): 8.76 (1H, br s, H<sup>6</sup>), 7.43 (1H, br s, Ar), 7.35 (2H, br s, AA'XX'), 7.15 (1H, br s, H<sup>x</sup>), 6.96 (2H, br s, AA'XX'), 6.60 (1H, br s, Ar), 5.43 (1H, s, CH acac), 4.01 (4H, m, OCH<sub>2</sub>), 3.29 (2H, br s, CH<sub>2</sub> cyclopenten), 2.98 (2H, br s, CH<sub>2</sub> cyclopenten), 2.13 (2H, m, CH<sub>2</sub> cyclopenten), 1.98 (3H, s, CH<sub>3</sub> acac), 1.93 (3H, s, CH<sub>3</sub> acac), 1.81 (4H, m, CH<sub>2</sub>), 1.47 (4H, m, CH<sub>2</sub>), 1.28 (28H, br m, CH<sub>2</sub>), 0.53 (4H, m, CH<sub>2</sub>-Si), 0.06 (12H, s, CH<sub>3</sub>, siloxane), 0.02 (6H, s, CH<sub>3</sub>, siloxane). Calcd. for C<sub>53</sub>H<sub>83</sub>NO<sub>6</sub>PtSi<sub>3</sub> (1108.52): C 57.37, H 7.55, N 1.26; found C 57.66, H 7.29, N 1.28.
